# Supplementary material for: Iron “ore” nothing: benthic iron fluxes from the oxygen-deficient Santa Barbara Basin enhance phytoplankton productivity in surface waters
Source: Copernicus journal article supplement (doi:10.5194/bg-21-773-2024), 2024-02-14
Supplement: Supplementary file 1 [file bg-21-773-2024-supplement.pdf]

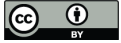

*Supplement of*

**Iron “ore” nothing: benthic iron fluxes from the oxygen-deficient Santa Barbara Basin enhance phytoplankton productivity in surface waters**

**De’Marcus Robinson et al.**

*Correspondence to:* De’Marcus Robinson ([demarcus1.robinson@atmos.ucla.edu](mailto:demarcus1.robinson@atmos.ucla.edu)) and Tina Treude ([ttreude@g.ucla.edu](mailto:ttreude@g.ucla.edu))

The copyright of individual parts of the supplement might differ from the article licence.

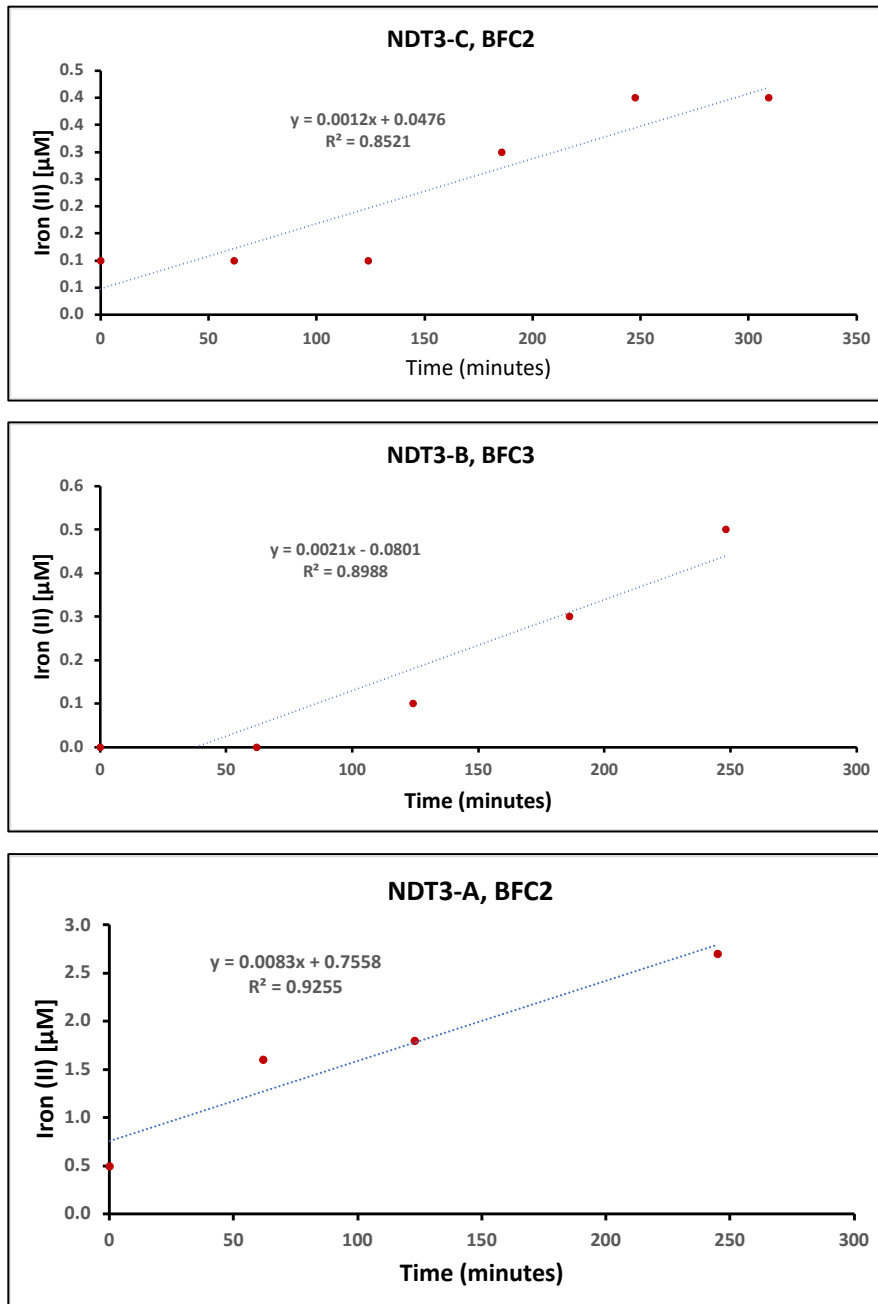

**Figure S1.** Development of dissolved Fe(II) concentration in the supernatant water of benthic flux chambers (BFC) deployed at the studied stations in the Santa Barbara Basin during the AT42-19 expedition (see also data in **Table 1**). The increase (slope) in Fe(II) over time was used for the calculation of benthic Fe(II) fluxes.

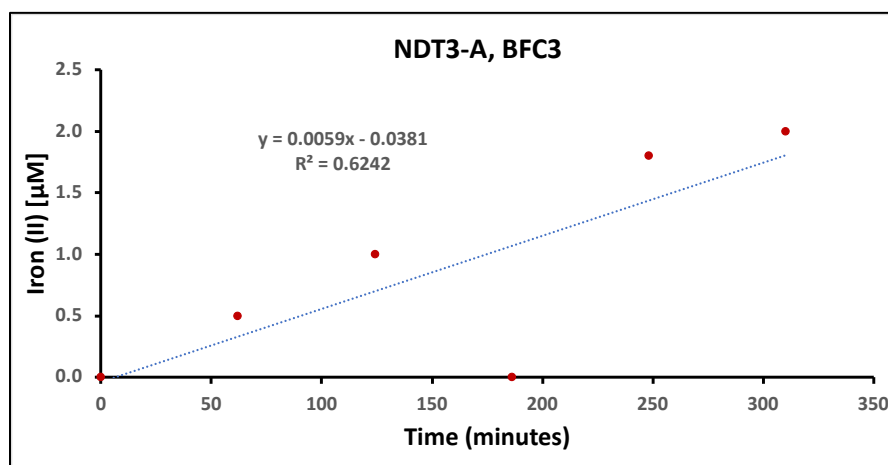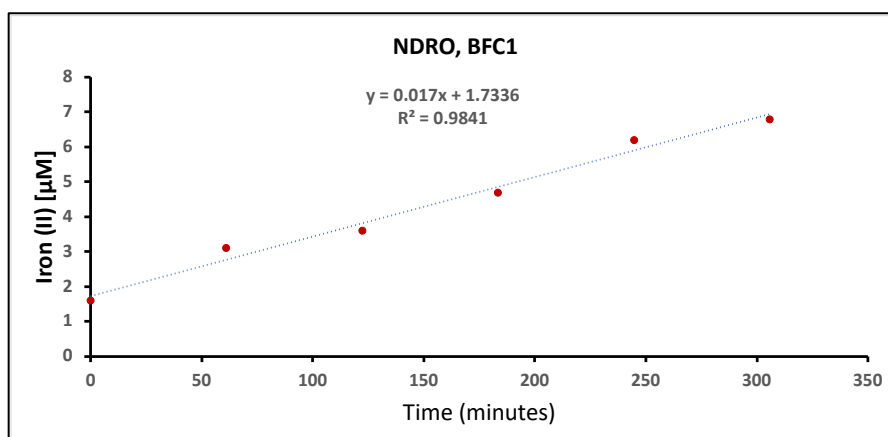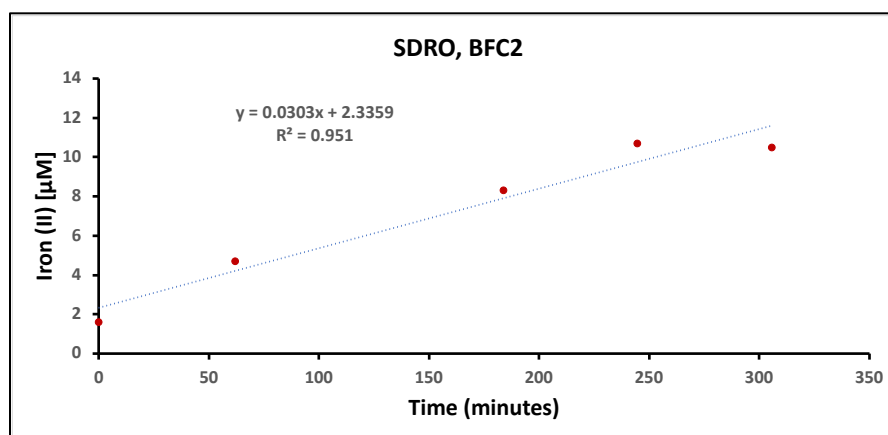

Figure S1. Continued.

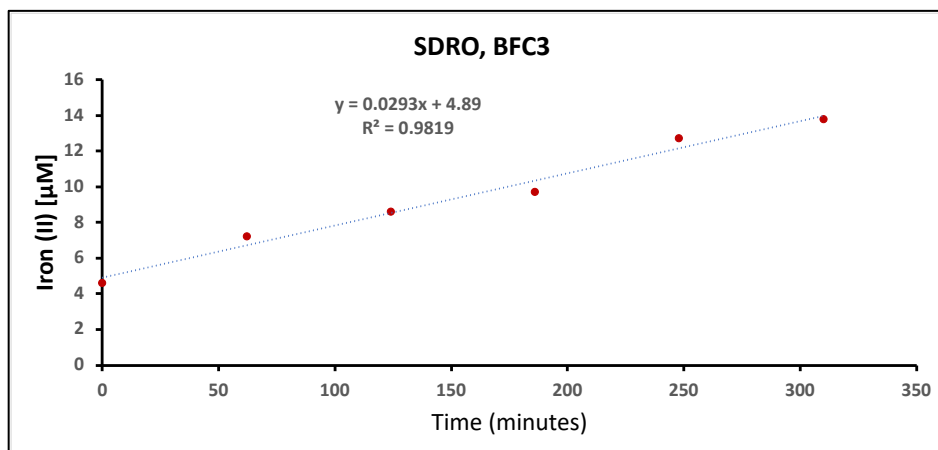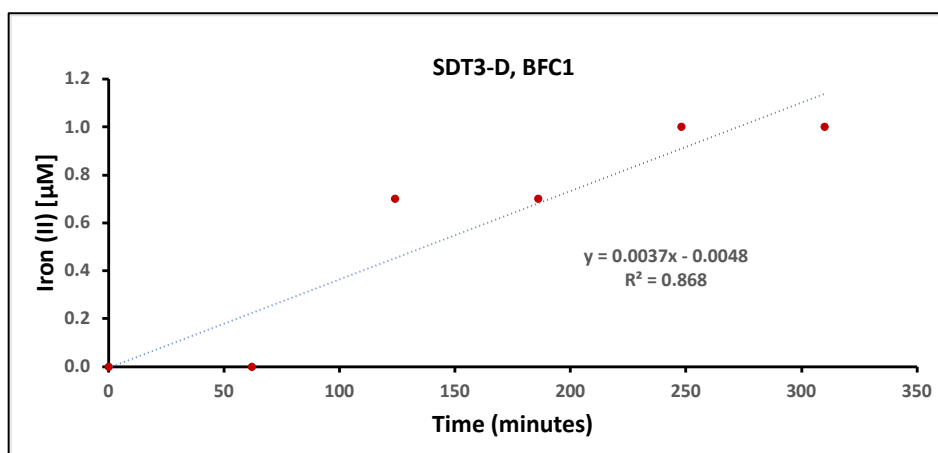

Figure S1. Continued.

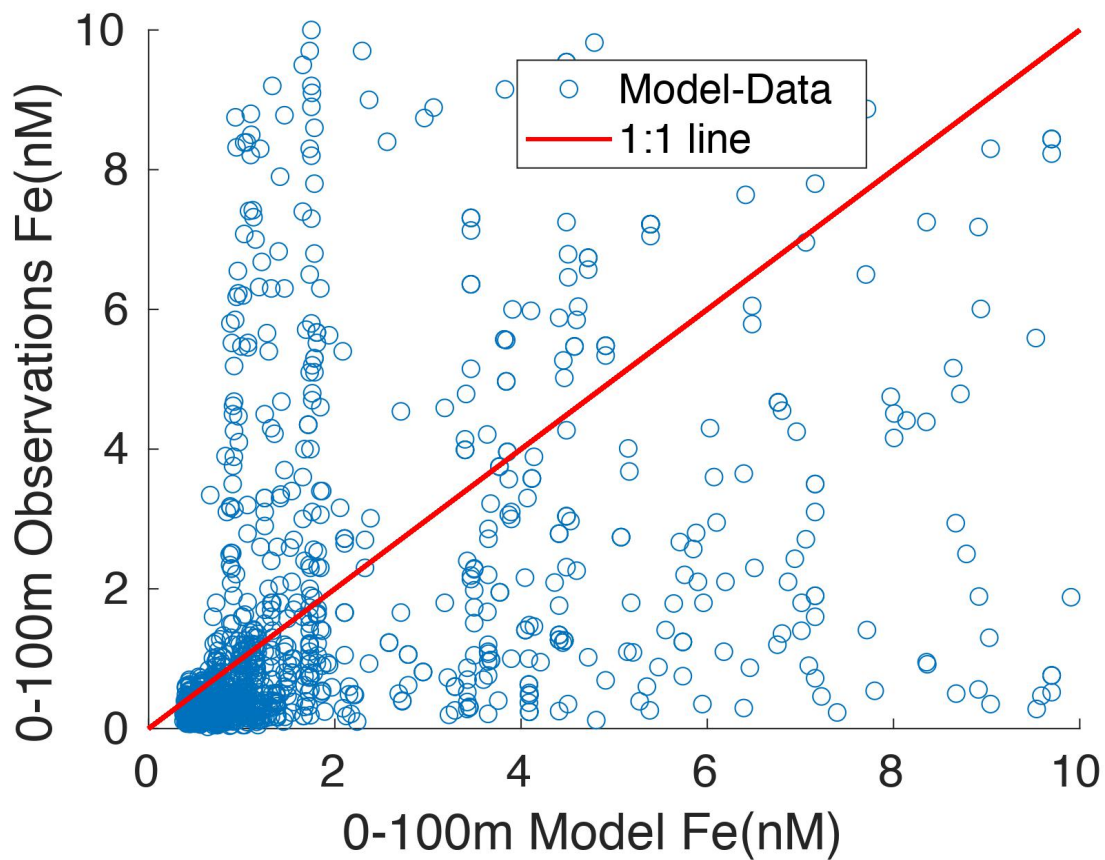

**Figure S2.** Scatter plot for the dissolved iron concentrations in the upper 100 m of the ocean from field measurements along the US West Coast (y-axis) and from the ROMS-BEC model, where we have field measurements (x-axis). Model data are sampled seasonally according to field measurements.  $R = 0.5$

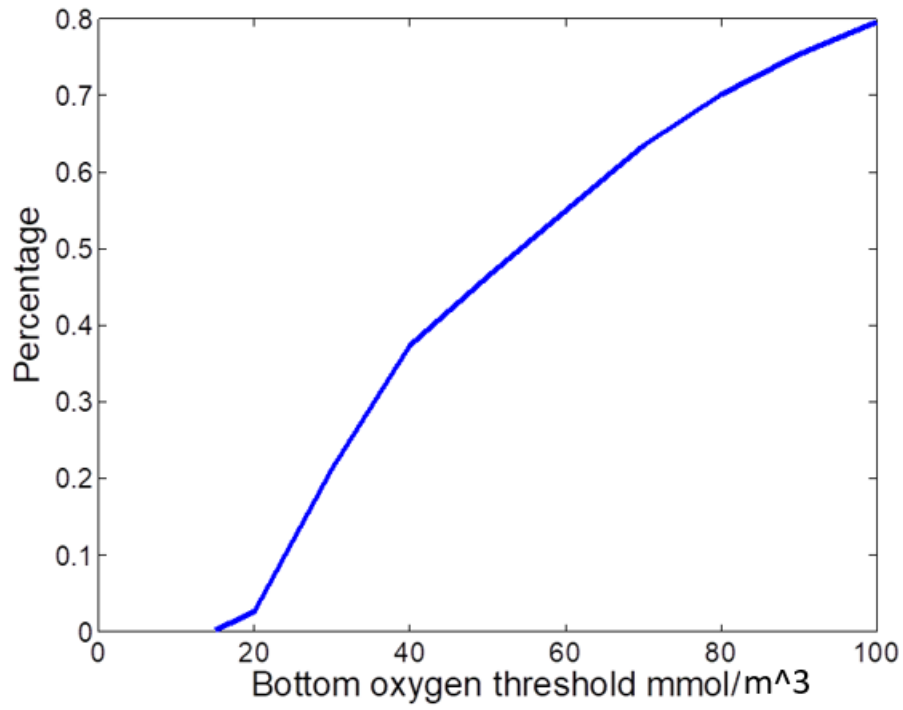

**Figure S3.** Modeled oxygen concentration throughout the domain where 80 percent of the oxygen concentration is between 20 to 100  $\mu\text{M}$ .

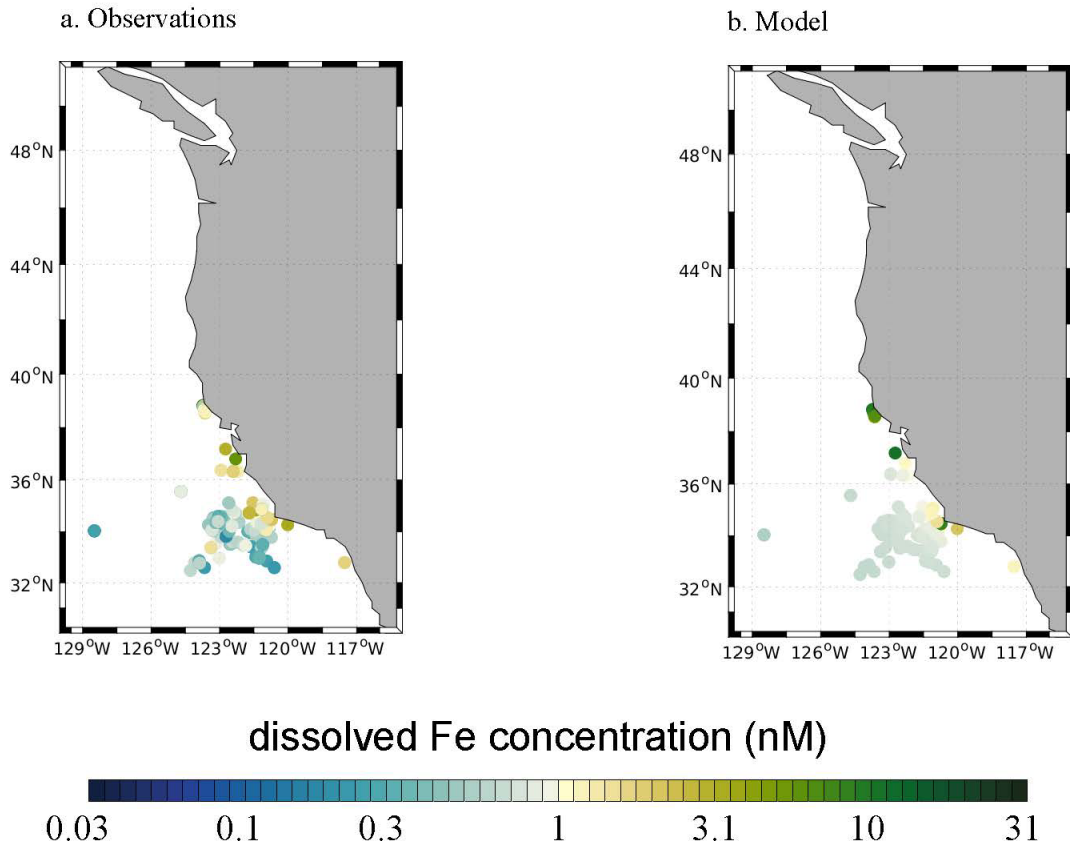

**Figure S4.** Dissolved iron (dFe) concentrations averaged between 100-200 m: (a) measured data (see manuscript section 2.4), (b) model results.

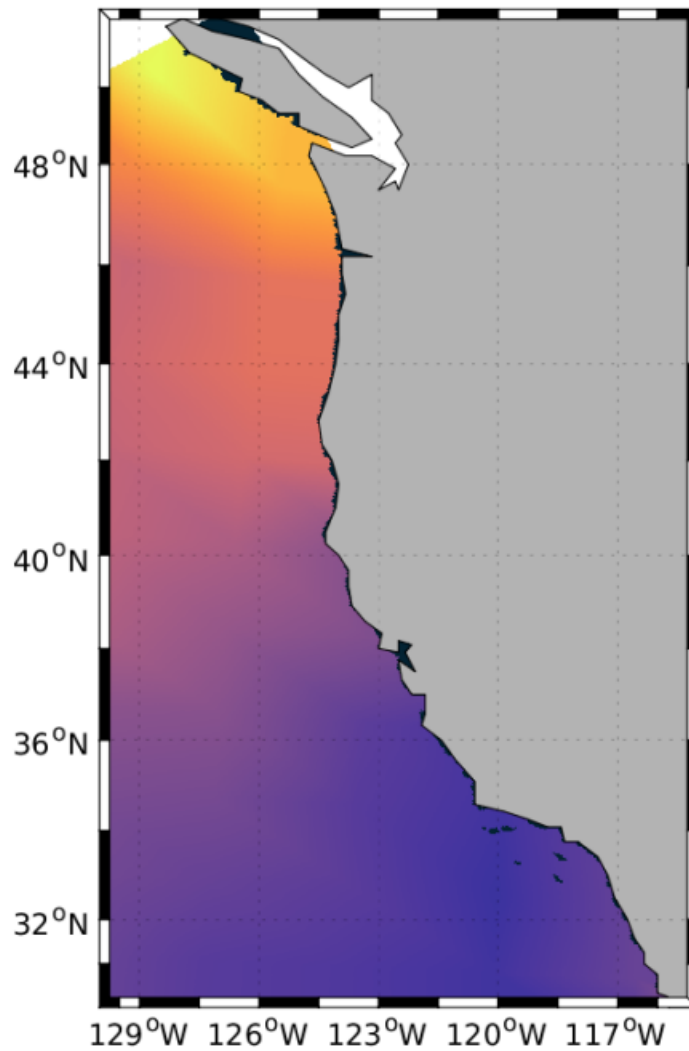

Atmospheric Fe deposition ( $10^{-3}$  mmol/m<sup>2</sup>/year)

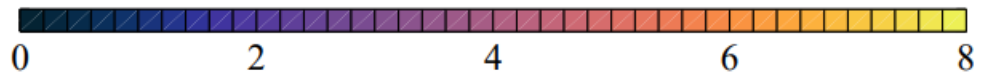

**Figure S5.** Atmospheric dFe deposition into the surface ocean of the CCS (32-48N). Higher atmospheric dFe deposition is observed north of 42°N.



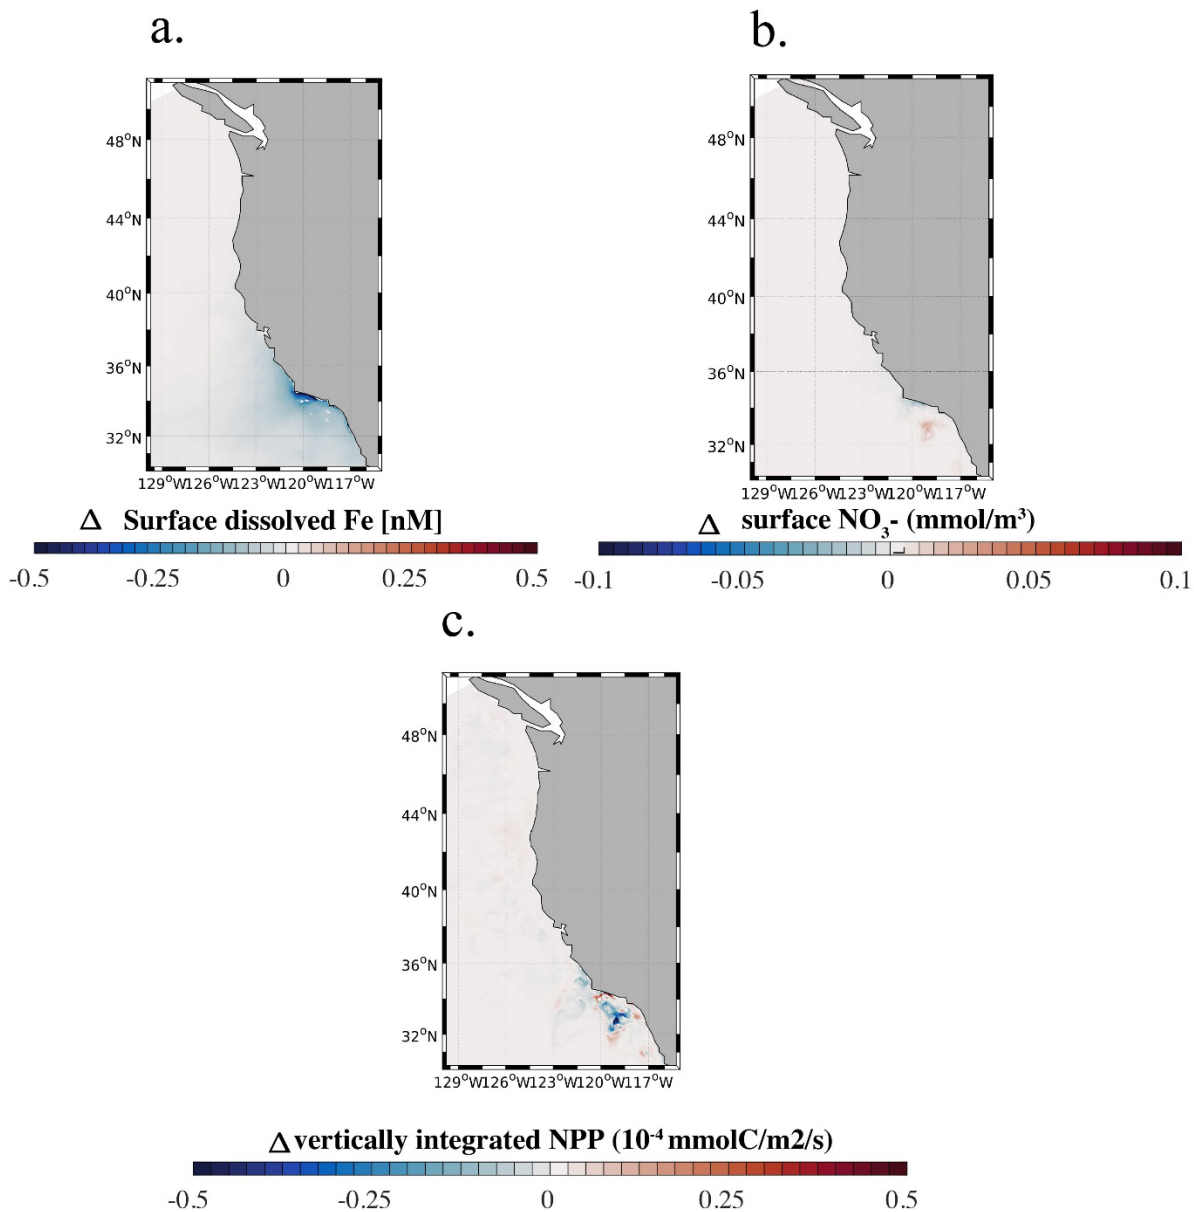

**Figure S6.** (a) Surface dFe anomalies, (b) Surface  $\text{NO}_3^-$  anomalies, and (c) vertically integrated net primary production (NPP) in the full domain from the *Hypoxia-off* model run relative to the *High flux* model run
